# Neurodegenerative Properties of Chronic Pain: Cognitive Decline in Patients with Chronic Pancreatitis

Marijtje L. A. Jongsma<sup>1,2,3</sup>, Simone A. E. Postma<sup>1,3</sup>, Pierre Souren<sup>3</sup>, Martijn Arns<sup>4</sup>, Evian Gordon<sup>5</sup>, Kris Vissers<sup>6</sup>, Oliver Wilder-Smith<sup>6</sup>, Clementina M. van Rijn<sup>1\*</sup>, Harry van Goor<sup>7</sup>

**1** Donders Centre for Cognition, Donders Institute for Brain, Cognition and Behaviour, Radboud University Nijmegen, Nijmegen, The Netherlands, **2** Department of Learning and Development, Behavioral Science Institute, Radboud University Nijmegen, Nijmegen, The Netherlands, **3** Research Technical Support Group (RTOG), Department of Social Psychology, Radboud University Nijmegen, Nijmegen, The Netherlands, **4** Research Institute Brainclinics, Nijmegen, The Netherlands, **5** The Brain Resource International Database and the Brain Resource Company, Ultimo, Australia, **6** Pain and Nociception Neuroscience Research Group, Department of Anaesthesiology, Pain and Palliative Medicine, Radboud University Nijmegen Medical Centre, Nijmegen, The Netherlands, **7** Pain and Nociception Neuroscience Research Group, Department of Surgery, Radboud University Nijmegen Medical Centre, Nijmegen, The Netherlands

## Abstract

Chronic pain has been associated with impaired cognitive function. We examined cognitive performance in patients with severe chronic pancreatitis pain. We explored the following factors for their contribution to observed cognitive deficits: pain duration, comorbidity (depression, sleep disturbance), use of opioids, and premorbid alcohol abuse. The cognitive profiles of 16 patients with severe pain due to chronic pancreatitis were determined using an extensive neuropsychological test battery. Data from three cognitive domains (psychomotor performance, memory, executive functions) were compared to data from healthy controls matched for age, gender and education. Multivariate multilevel analysis of the data showed decreased test scores in patients with chronic pancreatitis pain in different cognitive domains. Psychomotor performance and executive functions showed the most prominent decline. Interestingly, pain duration appeared to be the strongest predictor for observed cognitive decline. Depressive symptoms, sleep disturbance, opioid use and history of alcohol abuse provided additional explanations for the observed cognitive decline in some of the tests, but to a lesser extent than pain duration. The negative effect of pain duration on cognitive performance is compatible with the theory of neurodegenerative properties of chronic pain. Therefore, early and effective therapeutic interventions might reduce or prevent decline in cognitive performance, thereby improving outcomes and quality of life in these patients.

**Citation:** Jongsma MLA, Postma SAE, Souren P, Arns M, Gordon E, et al. (2011) Neurodegenerative Properties of Chronic Pain: Cognitive Decline in Patients with Chronic Pancreatitis. *PLoS ONE* 6(8): e23363. doi:10.1371/journal.pone.0023363

**Editor:** Harish Pant, National Institutes of Health, United States of America

**Received:** June 7, 2011; **Accepted:** July 13, 2011; **Published:** August 18, 2011

**Copyright:** © 2011 Jongsma et al. This is an open-access article distributed under the terms of the Creative Commons Attribution License, which permits unrestricted use, distribution, and reproduction in any medium, provided the original author and source are credited.

**Funding:** The authors have no support or funding to report.

**Competing Interests:** Two of the authors are employed in a commercial company: MA and EG. MA is the director of the Research Institute Brainclinics, Nijmegen, The Netherlands, and EG is the director of The Brain Resource International Database and the Brain Resource Company, Ultimo, Australia. The authors state that this does not alter their adherence to all the PLoS ONE policies on sharing data and materials.

\* E-mail: t.vanrijn@donders.ru.nl

These authors contributed equally to this work.

## Introduction

Chronic pancreatitis is a serious medical disease characterized by inflammation of the pancreas resulting in progressive and irreversible morphological changes and often end-stage exocrine/endocrine failure [1]. Alcohol abuse is the most common etiology in chronic pancreatitis, preceding the disease in 55%–80% of chronic pancreatitis patients in industrialized nations [2]. Severe chronic abdominal pain is the major presenting complaint present in 80%–90% of patients during the course of the disease [3,4]. Pain can be considered the most important factor causing a substantial loss of quality of life [5]. The intense relapsing or persistent pain in chronic pancreatitis leads to recurrent hospitalizations, multiple medical interventions, opioid addiction [6,7] and is associated with major socio-economic problems [8]. The pain in chronic pancreatitis is still not completely understood, but does involve peripheral nociceptive, peripheral neuropathic and central neuroplastic mechanisms [9].

It is now well accepted that neuroplasticity, i.e. altered central pain processing, plays an important role in the development of

chronic pain [10]. Once pain has become chronic, as in chronic pancreatitis, it is difficult to treat satisfactorily [3]. Thus surgical treatments aiming to interrupt nociceptive input from the pancreas, e.g. celiac plexus blockade, pancreatic denervation, or total pancreatectomy, fail to relieve pain in a substantial proportion of patients with chronic pancreatitis [11]. In general, long-term quality of life remains poor after surgery in patients with chronic pancreatitis [12]. The accompanying invalidity, reduced ability to work, induced sleep disturbances, increased anxiety and depressive symptoms [13,14], make chronic pancreatitis pain an unsolved healthcare problem in society.

Many patients suffering from chronic pain report cognitive complaints. There is substantial evidence that chronic pain can impair cognitive abilities [15,16,17,18,19,20,21,22,23,24].

However, most of these studies included patients with unspecified pain and pain syndromes of varying etiologies [22,25]. Moreover, explanations for the observed cognitive decline remain scarce. Possible explanations might be related to the observed chemical and structural changes in the brain of patients suffering from chronic pain [26,27,28]. Indeed, MRI research has

shown that in patients suffering chronic pain, gray matter density is decreased, especially in the prefrontal cortex and the thalamus [29,30,31,32]. Apkarian and colleagues reported that chronic pain patients were impaired on an emotional decision task, a test that has been directly linked to functional properties of the frontal lobe [33]. The authors explained their findings in terms of loss of gray matter in the frontal lobe of chronic pain patients [33]. To our knowledge, this was the first study directly linking neurodegeneration, chronic pain and a specific cognitive deficit.

In acute and chronic neurodegenerative diseases, neuronal cell death is also an important factor underlying the observed decline in cognitive functions [34]. In view of shared disease mechanisms (e.g. neuronal necrosis), it has been suggested that chronic pain should also be considered a neurodegenerative disorder [26].

Apart from severe pain, many chronic pancreatitis patients report also other factors that have been associated with a decrease in cognitive functions, such as depressive symptoms [35,36,37], sleep disturbances [38], use of opioid medication [39], and a history of alcohol abuse [40].

The objectives of this study were 3-fold. Firstly, we wanted to examine whether chronic pancreatitis pain is associated with cognitive decline. A second objective was to examine whether documented cognitive deficits are related to pain duration, supporting the hypothesis that chronic pain is a progressive neurodegenerative disorder. Thirdly, our aim was to examine to what extent other individual factors, e.g. depressive symptoms, sleep disturbance, opioid medication and a history of alcohol abuse, contribute to the cognitive decline of patients with chronic pancreatitis. To this end, the neuropsychological profile of chronic pancreatitis patients was documented by means of a complete neuropsychological test battery and compared with the neuropsychological profile of healthy controls matched for age, gender, and education.

## Methods

### Study design

Over a ten-month period, sixteen patients with confirmed chronic pancreatitis and associated chronic pain were referred to the Brainclinics Research Institute, Nijmegen, the Netherlands, for standardized assessment of their cognitive abilities. The diagnosis of pancreatitis was based on a standard battery of history, laboratory tests and radiological findings. Patients were ambulant and randomly selected from the outpatient clinic. Patients with

persistent alcohol use were excluded from the study. The control group consisted of 16 healthy volunteers who were matched to the chronic patient group according to age, gender, and years of education. For all participants, the standardized neuropsychological assessment protocol of the Brain Resource International Database was used [41]. For a description of demographic variables of the healthy volunteers and the chronic pancreatitis patients, see Table 1 upper panel.

For the healthy volunteers, medical ethical approval to collect the data was obtained (Committee on Research involving Human Subjects, Region Arnhem-Nijmegen nr. 2002/008). The patients were all referred by their physician in charge for neuropsychological testing, as part of their medical follow up. Written informed consent to use the data for scientific purpose was signed by all subjects, both healthy volunteers and patients.

### Data collection

Cognitive abilities were assessed by means of the Integneuro test battery using an automated touch screen tool [41]. The participants were instructed to refrain from smoking and drinking caffeine 2 hours before the study. They were seated in front of a touch screen computer (NEC MultiSync LCD 1530 V) in a sound attenuated room. Task instructions and materials were pre-recorded and delivered in a standardized way via headphones and using the visual display on the touch screen computer. The Integneuro test battery consisted of 13 tests, which covered three clusters of cognitive domains, namely psychomotor performance, memory, and executive functions. Some tests consisted of two or more subtests. For a description of the tests used, see [41] and Appendix S1. The total test battery took approximately 50 minutes to complete.

### Pain duration

The period (in years) that the chronic pancreatitis patients were under medical control for pain treatment was taken as measure of pain duration. Matched controls were free of chronic pain and scored 0 on this variable.

### Additional variables

Apart from group (chronic pancreatitis patients versus matched healthy volunteers) and pain duration, four covariates were included in this study; depressive mood, sleep disturbances, opioid use, and a history of alcohol abuse.

**Table 1.** Demographic and individual variables of the participants.

| Demographic variables of the participants |             | Healthy controls | Patients  |
|-------------------------------------------|-------------|------------------|-----------|
| Number of participants                    | (n)         | 16               | 16        |
| Age (years)                               | (mean ± SD) | 48.0±11.3        | 49.5±11.9 |
| Male/Female                               | (n/n)       | 10/6             | 10/6      |
| Years of education                        | (mean ± SD) | 11.9±2.9         | 11.8±3.1  |
| Individual variables of the participants  |             |                  |           |
| Pain duration (years)                     | (mean ± SD) | 0                | 6.12±3.01 |
| Depression (DASS-21)                      | (mean ± SD) | 1.75±2.38        | 5.27±4.78 |
| Sleeping disturbance                      | (yes/no)    | 7/9              | 6/10      |
| Opioid medication                         | (yes/no)    | 0/16             | 8/8       |
| History of alcohol abuse                  | (yes/no)    | 0/16             | 8/8       |

doi:10.1371/journal.pone.0023363.t001

In both patients and healthy volunteers, depressive mood was assessed by the short-form version of the Depression Anxiety Stress Scales (DASS-21) [42]. The DASS-21 is comprised of a 21-item questionnaire referring to the severity/frequency of negative emotional symptoms experienced “over the past week” with each item rated on a 4-point scale. The score for depression was calculated by summing the scores for the relevant items.

Information about sleep disturbance and opioid medication was obtained through a screening questionnaire leading to either the presence of sleep disturbances or not in both the patients and healthy volunteers. Information about a history of alcohol abuse in the past and or the use of opioid medication was extracted from the medical files of the patients (Table 1 lower panel). Sleep disturbance, use of opioid medication, and a history of alcohol abuse were scored in a dichotomous way (yes/no).

### Data and statistical analysis

The data of the current study were considered to be hierarchical, meaning there were measurements (level 1) within participants (level 2) and the test scores from these measurements were clustered in three different cognitive domains: psychomotor performance, memory, and executive functions. From this we expected dependency within the data. Therefore, a multivariate multilevel analysis was applied for the current data [43,44] The use of a multilevel approach was further supported by its

permitting the retention of participants that had missing data amongst the dependent variables (see Table 2).

A multivariate multilevel analysis with fixed occasion models was used. The models were set up using a one-by-one backward removal of non-significant fixed effects (the criterion was 1.65 for a Wald test, one sided 0.05 significance). Next, one-by-one non-significant covariances were removed using a deviance test. The last step consisted of the removal (once more) of non-significant fixed effects. We followed this procedure to ensure we did not overlook suppression effects and that the covariance matrix was, initially, as free as possible. For the analysis the package MLwiN (version 1.10.000.6) was used ([www.bristol.ac.uk/cmm/software/mlwin/](http://www.bristol.ac.uk/cmm/software/mlwin/)). For details of the analysis see [45,46].

For the clusters psychomotor performance, memory, and executive functions, four models were evaluated:

Model 0: this model was used for reference.

Model 1: group.

Model 2: pain duration.

Model 3: group and pain duration.

Model 4: group, pain duration and consecutive covariates (depression, sleep disturbances, use of opioid medication, and a history of alcohol abuse).

These models were not nested, thus comparison of the models using the standard deviance test was not appropriate. We used the Akaike's Information Criteria corrected for small samples (AICc)

**Table 2.** Raw scores of the participants of all the variables.

| Cluster                               | Test nr      | Variable measured                       | Healthy controls                |           | Patients    |           |
|---------------------------------------|--------------|-----------------------------------------|---------------------------------|-----------|-------------|-----------|
|                                       |              |                                         | Mean (SE)                       | N         | Mean (SE)   | N         |
| Psychomotor                           | 1            | Tapping freq. (dominant) (#)            | 164 (9)                         | 16        | 133 (13)    | 11        |
|                                       |              | Tapping freq. (non-dominant) (#)        | 154 (7)                         | 16        | 130 (11)    | 11        |
|                                       |              | Tapping variability (dominant) (ms)     | 21.1 (3.7)                      | 16        | 77.3 (22.9) | 11        |
|                                       |              | Tapping variability (non-dominant) (ms) | 29.1 (4.6)                      | 16        | 67.6 (22.5) | 11        |
|                                       | 2            | Target detection (ms)                   | 321 (12)                        | 13        | 375 (24)    | 13        |
|                                       | 3            | Choice Reaction Time (ms)               | 688 (19)                        | 16        | 816 (40)    | 16        |
|                                       | 4            | Working Memory Reaction Time (ms)       | 503 (36)                        | 13        | 604 (40)    | 15        |
|                                       | Memory       | 5                                       | Verbal word Learning trials (#) | 7.5 (0.3) | 16          | 6.9 (0.4) |
| Verbal word Learning trials (slope)   |              |                                         | 1.0 (0.1)                       | 16        | 1.0 (0.2)   | 16        |
| Verbal word Delayed recall (mean)     |              |                                         | 6.1 (0.6)                       | 16        | 5.7 (0.6)   | 16        |
| Verbal word Recognition (sensitivity) |              |                                         | 0.7 (0.3)                       | 16        | 0.7 (0.4)   | 16        |
| 6                                     |              | Maze A (s)                              | 279 (36)                        | 16        | 353 (56)    | 14        |
|                                       |              | Maze B (s)                              | 242 (34)                        | 16        | 305 (48)    | 14        |
| 7                                     |              | Digit span forward task                 | 5.7 (0.3)                       | 16        | 5 (0.3)     | 16        |
|                                       |              | Digit span backward task                | 3.7 (0.3)                       | 16        | 3.5 (0.4)   | 15        |
| 8                                     | Visual Span  | 6.4 (0.7)                               | 15                              | 6.4 (0.7) | 13          |           |
| Executive                             | 9            | Switching of Attention 1 (s)            | 22.3 (1.3)                      | 16        | 30.8 (3.4)  | 16        |
|                                       | 10           | Switching of Attention 2 (s)            | 56.3 (5.7)                      | 16        | 71.9 (7.0)  | 16        |
|                                       |              | Switching of Attention 2 (errors)       | 0.9 (0.3)                       | 16        | 3.4 (1.1)   | 14        |
|                                       | 11           | Verbal Interference (correct)           | 9.4 (0.9)                       | 16        | 6.0 (0.9)   | 16        |
|                                       |              | Verbal Interference (errors)            | 1.2 (0.3)                       | 16        | 1.8 (0.3)   | 16        |
| 12                                    | Intrusions   | 0.1 (0.1)                               | 16                              | 0.4 (0.1) | 16          |           |
| 13                                    | Go-NoGo (ms) | 311 (15)                                | 13                              | 350 (21)  | 12          |           |

Mean and standard error (SE) with number of participants (N) of the unstandardized cognitive tests scores in the psychomotor -, memory - and executive functioning cluster.

doi:10.1371/journal.pone.0023363.t002

to evaluate the multiple regression models and select the “best” model for cognitive functions for each cluster at two levels (see Appendix S2).

For the multivariate multilevel analysis the test score variables for the clusters psychomotor performance, memory, and executive functions, were standardized (range between  $-2$  and  $2$ , mean zero). The predictor ‘group’ was a dichotomous variable (patients versus healthy controls) and the predictor ‘pain duration’ was a continuous variable with standardized values within the patients group (where the value for the control group is arbitrary and chosen to be  $0$  as it does not vary within that group). All covariates were dichotomous variables, except for the depression score, which was continuous and these scores were standardized in the multilevel analysis (range between  $-2$  and  $2$ , mean zero).

Effects (E) on the test scores of the neuropsychological tests were calculated and in order to compare the effects, effect sizes (ES) for the continuous and dichotomous variables were calculated (see Appendix S3).

For a comprehensive illustration of the calculation and interpretation of estimated effects and effect sizes of the predictors ‘group’ and ‘pain duration’ see Appendix S4.

## Results

### Demography

The study sample consisted of 16 patients with chronic pancreatitis pain and 16 healthy controls. Patients and healthy controls were matched according to age, gender, and years of education (Table 1). Mean duration of chronic pancreatitis pain was 6 years, 8 patients had a history of alcohol abuse and 8 patients used opioid medication to relieve their pain (Table 1).

### Psychomotor performance

For the cluster psychomotor performance, model 2 with the predictor ‘pain duration’ (period of pain in years) had a lower AICc value (366.8) compared to the AICc of model 1 (376.2) including the predictor ‘group’ (patient or healthy control) (Table 3). Therefore, ‘pain duration’ was a better predictor than the predictor ‘group’ for the observed test scores on psychomotor performance. In addition, model 4 had the lowest AICc value (325.9). This model, including the predictors ‘group’ and ‘pain duration’ together with consecutive covariates, gave the best explanation (i.e. fit) for the variance in the observed test scores for psychomotor performance (Table 3). Table 4 shows the significant

effects of ‘group’ and ‘pain duration’ for the cluster psychomotor performance with model 1, 2, 3 and 4.

The effects of ‘group’ were significant for all seven tests when ‘pain duration’ and covariates were included (i.e. model 4), meaning that chronic pain patients performed worse on all tasks within the psychomotor cluster compared to the healthy controls (Table 2, Table 4 upper panel). Vice versa, the effect of ‘pain duration’ remained a significant predictor, when ‘group’ and covariates were included (model 4, Table 4 lower panel). In more detail, a comparison between the predictor ‘group’ and the predictor ‘pain duration’ on e.g. the ‘Tapping frequency’ tasks regarding effects showed that the effect sizes of ‘pain duration’ with significant estimated effects ( $-0.62$ , dominant hand) and ( $-0.47$ , non-dominant hand) were higher than the effect sizes of ‘group’ with significant estimated effects ( $-0.73$  and  $-0.71$  respectively) (Table 4). Thus on the ‘Tapping frequency’ tasks pain patients tapped significantly more slowly compared to healthy controls. In addition, tapping frequency was significantly further decreased in patients with long pain duration compared to patients with short pain durations. Also, the effect sizes for ‘pain duration’ with significant estimated effects ( $-0.84$ ) and ( $-0.75$ ) on the ‘Tapping variability’ of the dominant and non-dominant hand were higher than the effect sizes for ‘group’ with significant estimated effects ( $-1.13$ ) and ( $-1.49$ ). Patients showed significantly more variability between tapping compared to the healthy controls on this task and this variability significantly further increased with longer pain durations (Table 4). Similarly, in the ‘Target detection’ task the effect size of ‘pain duration’ with a significant estimated effect ( $-0.55$ ) was stronger than the effect size for ‘group’ with significant estimated effect ( $-1.85$ ) on the reaction times in this task. Thus, patients showed an increase in reaction time compared to the healthy controls and long pain durations were accompanied by prolonged reaction times compared to short pain durations in this ‘Target detection task’.

With respect to the domain of psychomotor performance which comprised seven tests, the covariate depression appeared to hold additional explanatory effects with respect to two tests: the ‘‘Variability’’ in taps of the non-dominant hand and performance on the ‘Choice Reaction Time’ test. Similarly, a presence of sleep disturbance holds additional explanatory effects for two tests: ‘Tapping’ with the dominant hand and with the non-dominant hand. Finally, the use of opioid medication also holds additional explanatory effects for two tests: ‘Variability’ in taps of the dominant and the non-dominant hand. A history of alcohol abuse

**Table 3.** Statistical outcomes of the multivariate analysis.

|             |                     | Model 0 reference | Model 1 group | Model2 duration | Model 3 group and duration | Model 4 group and duration and covariates |
|-------------|---------------------|-------------------|---------------|-----------------|----------------------------|-------------------------------------------|
| Psychomotor | Fit                 | 328.0             | 320.7         | 311.2           | 300.1                      | 193.4                                     |
|             | (cases, parameters) | (184,21)          | (184, 24)     | (184, 24)       | (184, 28)                  | (178, 48)                                 |
|             | AICc                | 375.7             | 376.2         | 366.8           | 366.6                      | 325.9                                     |
| Memory      | Fit                 | 507.1             | 504.4         | 480.9           | 480.9                      | 439.9                                     |
|             | (cases, parameters) | (283, 35)         | (283, 35)     | (273, 39)       | (273, 39)                  | (270, 49)                                 |
|             | AICc                | 587.3             | 584.6         | 572.3           | 572.3                      | 560.2                                     |
| Executive   | Fit                 | 444.9             | 438.0         | 425.7           | 412.6                      | 362.2                                     |
|             | (cases, parameters) | (191, 22)         | (191, 25)     | (191, 24)       | (191, 30)                  | (185, 38)                                 |
|             | AICc                | 494.9             | 495.9         | 480.9           | 484.2                      | 458.5                                     |

Fits (with corresponding cases and parameters) and AICc values for the clusters psychomotor -, memory - and executive functions.

doi:10.1371/journal.pone.0023363.t003

**Table 4.** Significant effects of the multivariate analysis.

| Cluster                        | Test nr    | Variable measured                  | Model 1 group only                  | Model 2 duration only | Model 3 group and duration | Model 4 group and duration and covariates |                              |
|--------------------------------|------------|------------------------------------|-------------------------------------|-----------------------|----------------------------|-------------------------------------------|------------------------------|
|                                |            |                                    | Estimate (SE)                       | Estimate (SE)         | Estimate (SE)              | Estimate (SE) <sup>covariates</sup>       |                              |
| <b>Predictor Group</b>         |            |                                    |                                     |                       |                            |                                           |                              |
| Psychomotor                    | 1          | Tapping freq.(dominant)            |                                     |                       |                            | -0.73 (0.27) <sup>2</sup>                 |                              |
|                                |            | Tapping freq.(non-dominant)        |                                     |                       |                            | -0.71 (0.28) <sup>2,4</sup>               |                              |
|                                |            | Tapping variability (dominant)     |                                     |                       | -0.43 (0.14)               | -1.13 (0.26) <sup>3,4</sup>               |                              |
|                                |            | Tapping variability (non-dominant) |                                     |                       |                            | -1.49 (0.29) <sup>1,3,4</sup>             |                              |
|                                | 2          | Target detection (time)            | -0.49 (0.26)                        |                       | -0.44 (0.26)               | -1.85 (0.34) <sup>4</sup>                 |                              |
|                                |            | Choice Reaction Time               | -0.44 (0.20)                        |                       | -0.39 (0.20)               | -0.51 (0.28) <sup>1,4</sup>               |                              |
|                                | 4          | Working Memory Reaction Time       | -0.46 (0.25)                        |                       | -0.48 (0.26)               | -1.39 (0.38) <sup>4</sup>                 |                              |
|                                |            | Verbal word Learning trials (#)    |                                     |                       |                            | <sup>3,4</sup>                            |                              |
|                                | Memory     | 5                                  | Verbal word Learning trials (slope) |                       |                            |                                           |                              |
|                                |            |                                    | Verbal word Delayed recall          |                       |                            |                                           | 0.49 (0.15) <sup>4</sup>     |
|                                |            |                                    | Verbal word Recognition             |                       |                            |                                           | -0.67 (0.31) <sup>3</sup>    |
|                                |            |                                    | Maze A                              |                       |                            |                                           | 0.55 (0.27) <sup>1,3,4</sup> |
|                                |            | 6                                  | Maze B                              |                       |                            |                                           | -0.59 (0.28) <sup>1,4</sup>  |
| Digit span forward task        |            |                                    |                                     |                       |                            |                                           |                              |
| 7                              |            | Digit span backward task           |                                     |                       |                            |                                           |                              |
|                                |            | Visual Span                        | 0.29 (0.16)                         |                       |                            | <sup>2</sup>                              |                              |
| Executive                      |            | 9                                  | Switching of Attention 1            |                       |                            |                                           | -0.80 (0.22)                 |
|                                |            |                                    | Switching of Attention 2            |                       |                            |                                           |                              |
|                                |            | 11                                 | Switching of Attention 2 (errors)   |                       |                            | 0.69 (0.22)                               |                              |
|                                |            |                                    | Verbal Interference (correct)       | -0.60 (0.21)          |                            |                                           | -1.06 (0.14) <sup>2,3</sup>  |
|                                |            | 12                                 | Verbal Interference (errors)        |                       |                            |                                           |                              |
|                                | Intrusions |                                    |                                     |                       | 0.64 (0.25)                | 0.58 (0.27) <sup>3</sup>                  |                              |
|                                | 13         | Go-NoGo                            | 0.63 (0.36)                         |                       | 0.79 (0.33)                | 1.63 (0.42) <sup>1</sup>                  |                              |
| <b>Predictor Pain duration</b> |            |                                    |                                     |                       |                            |                                           |                              |
| Psychomotor                    | 1          | Tapping freq.(dominant)            |                                     | -0.55 (0.20)          | -0.21 (0.06)               | -0.62 (0.19) <sup>2</sup>                 |                              |
|                                |            | Tapping freq.(non dominant)        |                                     | -0.39 (0.22)          |                            | -0.47 (0.21) <sup>2,4</sup>               |                              |
|                                |            | Tapping variability (dominant)     |                                     | -0.69 (0.20)          | -0.40 (0.10)               | -0.84 (0.16) <sup>3,4</sup>               |                              |
|                                |            | Tapping variability (non dominant) |                                     | -0.37 (0.22)          |                            | -0.75 (0.18) <sup>1,3,4</sup>             |                              |
|                                | 2          | Target detection (time)            |                                     | -0.41 (0.20)          | -0.34 (0.19)               | -0.55 (0.17) <sup>4</sup>                 |                              |
|                                |            | Choice Reaction Time               |                                     |                       |                            |                                           |                              |
|                                | 4          | Working Memory Reaction Time       |                                     |                       |                            |                                           |                              |
|                                |            | Verbal word Learning trials (#)    |                                     | -0.45 (0.24)          | -0.45 (0.24)               | <sup>3</sup>                              |                              |
|                                | Memory     | 5                                  | Verbal word Learning trials (slope) |                       |                            |                                           |                              |
|                                |            |                                    | Verbal word Delayed recall          |                       | -0.46 (0.22)               | -0.46 (0.22)                              |                              |
|                                |            |                                    | Verbal word Recognition             |                       |                            |                                           | <sup>3</sup>                 |
|                                |            |                                    | Maze A                              |                       | -0.49 (0.24)               | -0.49 (0.24)                              | -0.05 (0.01) <sup>1</sup>    |
|                                |            | 6                                  | Maze B                              |                       | -0.45 (0.24)               | -0.45 (0.24)                              |                              |
| Digit Forward task             |            |                                    |                                     | -0.51 (0.24)          | -0.51 (0.24)               | -0.29 (0.14)                              |                              |
| 7                              |            | Digit Backward task                |                                     |                       |                            |                                           |                              |
|                                |            | Visual Span                        |                                     |                       |                            | <sup>2</sup>                              |                              |
| Executive                      |            | 9                                  | Switching of attention 1            | -0.62 (0.15)          | -0.64 (0.15)               | -0.49 (0.10) <sup>2,3</sup>               |                              |
|                                |            |                                    | Switching of attention 2            | -0.35 (0.15)          | -0.34 (0.15)               |                                           |                              |
|                                |            | 11                                 | Switching of attention 2 (errors)   | 0.78 (0.18)           | 0.81 (0.17)                | 0.57 (0.14) <sup>1,4</sup>                |                              |
|                                |            |                                    | Verbal Interference (correct)       |                       |                            |                                           |                              |
|                                |            | Verbal Interference (errors)       |                                     |                       |                            |                                           |                              |

**Table 4.** Cont.

| Cluster | Test nr | Variable measured | Model 1 group only | Model 2 duration only | Model 3 group and duration | Model 4 group and duration and covariates |
|---------|---------|-------------------|--------------------|-----------------------|----------------------------|-------------------------------------------|
|         |         |                   | Estimate (SE)      | Estimate (SE)         | Estimate (SE)              | Estimate (SE) <sup>covariates</sup>       |
|         | 12      | Intrusions        |                    |                       |                            |                                           |
|         | 13      | Go-NoGo           |                    |                       |                            |                                           |

Estimates and SE (standard error) from the multivariate multilevel analysis explaining test scores with predictors 'group' (upper panel) and 'pain duration' (lower panel). ( $n = 32$ , 16 pain patients).

Shown are the significant effects of predictors 'group' and 'pain duration' on test scores in the psychomotor -, memory - and executive functioning clusters with covariates of relevance.

All effects with  $p \leq 0.05$ .

Covariates (<sup>1</sup> = depression, <sup>2</sup> = sleep disturbance, <sup>3</sup> = opioid medication, and <sup>4</sup> = alcoholism).

doi:10.1371/journal.pone.0023363.t004

appeared to have additional explanatory effects with respect to the six tests: 'Tapping' with the non dominant hand, 'Variability' in taps of both the dominant and the non-dominant hand, 'Choice Reaction Time' test, 'Target Detection' test, and 'Working Memory' test. Alcohol abuse is therefore the covariate with the greatest impact.

### Memory

In the cluster memory, the ranking of the AICc values of the 4 different models showed that model 2 with the predictor 'pain duration' (AICc 572.3) was the better statistical model for explaining memory compared to model 1 with the predictor 'group' (AICc 584.6). Thus the predictor 'pain duration' was a better predictor than the predictor 'group' (chronic pancreatitis patient or healthy control) with respect to memory. However, this advantage disappeared when covariates were added in the model (Table 4). Model 4 had the lowest AICc value (560.2), so the predictors 'group' and 'pain duration' and consecutive covariates together best explained the observed test scores for memory performance (Table 3).

The estimated effects of 'group' in model 4 were significant for both parts of the 'Maze learning' tasks (0.55) and (-0.59), 'Delayed recall' of the verbal word learning task (0.49) and 'Recognition' of the verbal word learning task (-0.67) tests. Thus pain patients scored less accurately on these tasks compared to healthy controls (Table 2, Table 4 upper panel). In the test 'Digits Forward' task, long pain duration gave significantly decreased scores compared to short pain duration, with an estimated effect of (-0.29) for pain duration.

The cluster memory compromised nine tests. Depression appeared to be of relevance by having additional explanatory effects with respect to two tests ('Maze learning' A and B). In addition sleep disturbance had additional explanatory effects in one test: the 'Visual span' test. The use of opioid medication had additional explanatory effects with respect to three tests: 'Maze learning A', verbal word learning and recognition of verbal word learning. A history of alcohol abuse had additional explanatory effects in four tests within the cluster memory: maze learning A and B, verbal word learning and the delayed recall of verbal word learning.

### Executive functions

In the cluster executive functions, the model with 'pain duration' (AICc 480.9) better explained the test scores of executive functions than the model with 'group' (AICc 495.9). Multilevel analysis showed that duration of pain remained of importance

when the covariates were included (model 4), according to the estimated effects (Table 4). Again, model 4 had the lowest AICc value (458.5) and therefore is the best fit for the test scores in the cluster executive functions (Table 3).

The estimated effects of 'group' were significant with respect to the tests 'Switching of attention 1' (-0.80), correct responses on the 'Verbal interference' test (-1.06), 'Intrusions' on the verbal word learning task (0.58), and reaction times to the 'Go-NoGo' task (1.63), meaning that patients showed a significant decline in executive functions compared to the healthy controls (Table 2, Table 4 upper panel). The predictor 'pain duration' had significant estimated effects for the speed in 'Switching of attention 1' test (-0.49) and errors on the 'Switching of attention 2' test (0.57). The effect size of 'pain duration' with significant estimated effect (-0.49) is higher compared to the effect size of group with significant estimated effect (-0.80) for the 'Speed in switching of attention 1' test. Depression had relevant explanatory effects next to 'pain duration' and 'group' with respect to two executive function tests: the number of errors in the 'Switching of attention 2' and the reaction times in the 'Go-NoGo' task. In addition, sleep disturbance had explanatory effects with respect to two tests: the speed in 'Switching of attention 2' (time) and on correct responses in the 'Verbal interference' test. The use of opioid medication had explanatory effects in three tests: correct responses on the 'Verbal interference' test, 'Intrusions' and speed of 'Switching of attention 1'. Finally, a history of alcohol abuse only had additional effects on the errors on the 'Switching of attention 2' test'.

In summary, for each cognitive cluster, the predictor 'pain duration' (model 2) gave a better explanation for the variance in cognitive performance (i.e. had a lower AICc value) than the predictor 'group' (model 1) did. However, variance in all three cognitive domains could be best explained with model 4 which included 'group' and 'pain duration' together with relevant covariates of depression, sleep disturbance, opioid medication, and a history of alcohol abuse. The mean performance of the patients, in those nine tests that were significant deviant from controls with respect of pain duration, was 73% of that of the controls (SEM 3.4,  $n = 108$  test values, Table 4 lower panel, model 4). The impact of the duration of the pain on this decline is visualized in figure 1.

### Discussion

The current study investigates whether chronic pancreatitis pain is accompanied by a decline in cognitive performance, and whether this decline could be related to neurodegenerative

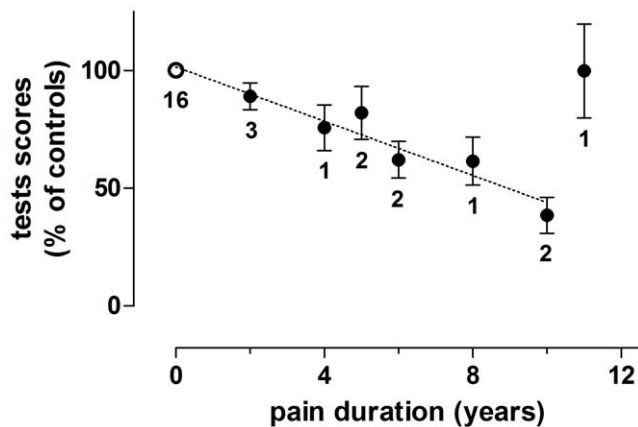

**Figure 1. Pain duration dependent decrease in cognitive performance.** The figure visualized the pain duration dependent decrease in cognitive performance. Test scores are depicted (ordinate) versus duration of pain in years (abscissa). Only the scores on those nine tests with  $p \leq 0.05$ , explaining test scores with predictors 'pain duration' are given (see Table 4 lower panel, model 4: 'pain duration'). The mean of the scores of the controls (with pain duration zero) on each of the nine tests was taken as 100%. For those test where an increase in test score indicated a decrease in performance, the inverse of the raw scores was taken. The percentage of the test scores of each individual subjects was calculated. The mean and SE of all these percentages (so of all subjects on all nine tests) are shown. For each point the number of subjects is indicated. Remarkable is that the patient that had pain duration of 11 years had a mean test score on the nine tests comparable to the controls. This patient was a young patient of only 29 years old.

doi:10.1371/journal.pone.0023363.g001

properties of the chronic pain. Neuropsychological profiles of patients suffering from chronic pancreatitis pain were compared to those from healthy matched controls.

We found that patients with chronic pancreatitis pain performed significantly worse on tests within all three cognitive domains compared to matched healthy controls. Moreover, the test scores could best be explained when pain duration was included as a second predictor, additional to being a patient or healthy control. Thus, longer pain durations were associated with greater declines in cognitive performance of patients and 'pain duration' resulted in larger effect sizes for predicting the test scores on cognitive tasks than 'group' did.

Pain duration particularly affects functions in the cluster psychomotor performance. Psychomotor performance strongly relies on the intactness of the frontal lobes. Thus the psychomotor slowing observed in the pancreatitis pain patients may be attributable to alterations of motor- and premotor cortices as well as midbrain structures regulating the general level of arousal (e.g. the thalamus) [47].

The findings of the current study related to the domain of psychomotor performance may further have been affected by all four covariates investigated. These factors have all previously been associated with a decrease in psychomotor speed [36,38,48,49]. In the current study these four factors all offered some additional explanation for the observed decrease in psychomotor performance in the patients, but this appears less substantial than the explanatory effect of pain duration.

Pancreatitis pain patients also showed impairments in executive functions. Significant effects of pain duration were found on tasks that highly depended on mental flexibility (i.e. switching of attention task), self-monitoring abilities (i.e. intrusions on word learning) and withholding a response (i.e. verbal interference).

Executive functions represent a high, more abstract level of processing, and are mainly supported by the prefrontal cortex [50]. Interestingly, Apkarian et al., [29] observed a loss of cortical grey matter in patients suffering from chronic pain, especially in the frontal cortices and thalamus. In a subsequent study, a link between decreased grey matter in the prefrontal lobe and a reduced performance on an emotional decision-making task was suggested [26,33]. The observed decline in psychomotor and executive performance observed in our pancreatitis pain patients might thus also be, at least partly, ascribed to a loss of grey matter in the frontal cortices and thalamus.

Memory performance was the least affected cognitive function in patients with chronic pancreatitis. Mild problems with memory functioning have previously been related to depressive symptoms [35,36,51]. Thus, a mild decline in memory might be related to the increased depression scores found in the patients compared to healthy controls. Although previous studies of patients with chronic pain often have reported memory deficits [22,52], this domain is only mildly affected within the current study.

Depression, sleep disturbance, use of opioids, and a history of alcohol abuse, are all factors that have been associated with decreased cognitive abilities. Therefore, in the current study these factors were included in the models explaining the observed variance in neuropsychological test data. Indeed, with respect to a number of the tests, these factors did offer additional explanation for the observed cognitive decline in pancreatitis patients. Of these factors, a history of alcohol abuse appeared to be the most prominent factor. However, the effect sizes of a history of alcohol abuse were still modest in comparison with the effect sizes of chronic pain and pain duration (data not shown). This limited effect might be ascribed to the long duration of alcohol abstinence at time of testing in our patients, i.e. at least one year. Indeed, significant recovery has been found within one year of abstinence in most cognitive domains [53,54,55,56]. Fein et al. examined cognitive performance in long-term abstinent middle-aged alcoholics and found that abstinent alcoholics performed similarly to controls in all areas of cognitive performance, except for a minor deficit in spatial processing [55].

In this study a homogenous group of patients was recruited, all having a confirmed diagnosis of pancreatitis. Despite the patients being homogenous in the cause of the pain, it is still difficult to ascribe the observed cognitive deficits to just one underlying cause. This difficulty is not only due to the variation in the duration of their pain disease but also due to comorbidity with depression, sleep disturbances, the high prevalence of a history of alcohol abuse and a current use of opioid medication. However, by applying multivariate multilevel analyses we were able to entangle at least partially the differential influences of these contributing factors.

The uniqueness of this study is that it is the first study to formally assess the cognitive performance of chronic pancreatitis pain patients. Previous studies in this field have focused on other chronic pain patients e.g. low back pain [57] and fibromyalgia [23,25,58], or mixed pain conditions in patients with chronic non-malignant pain [22,59]. The similar findings of a decline in cognitive performance in these previous studies and those in the present study support the concept that the chronic pain itself is the denominator of cognitive decline and not the associated pathology giving rise to the chronic pain syndrome.

The direct detrimental effect of pain duration on cognitive performance in the present study is a new observation, which has not been reported previously. This negative effect of pain duration on cognitive performance supports the novel concept of viewing chronic pain as a disease with neurodegenerative properties. From

a therapeutic perspective, the suggestion that neurodegeneration may be related to chronic pancreatitis pain is extremely relevant. Typically, chronic pancreatitis patients with pain are treated with pain medication including opioids over long periods of time, with limited treatment success and low health-related quality of life, predominantly as a result of persisting or relapsing pain despite medication [60]. As a consequence, patients frequently become unemployed, and may even be deprived of the ability to indulge in social and sport activities [8]. In this context, earlier and more effective therapeutic interventions targeting not only the cause of pain or blocking sensory input, but also specifically addressing the associated central neuroplasticity might reduce or prevent neurodegeneration and decline in cognitive performance, thereby improving the pain outcomes and quality of life in these patients.

## Supporting Information

### Appendix S1 Appendix S1 gives a detailed description of the neuropsychological tests used.

(DOCX)

## References

- Drewes AM, Gratkowski M, Sami SA, Dimcevski G, Funch-Jensen P, et al. (2008) Is the pain in chronic pancreatitis of neuropathic origin? Support from EEG studies during experimental pain. *World journal of gastroenterology*: WJG 14: 4020–4027.
- Mergener K, Baillie J (1997) Chronic pancreatitis. *Lancet* 350: 1379–1385.
- Andren-Sandberg A, Hoem D, Gislason H (2002) Pain management in chronic pancreatitis. *European journal of gastroenterology & hepatology* 14: 957–970.
- van Esch AA, Wilder-Smith OH, Jansen JB, van Goor H, Drenth JP (2006) Pharmacological management of pain in chronic pancreatitis. *Digestive and liver disease: official journal of the Italian Society of Gastroenterology and the Italian Association for the Study of the Liver* 38: 518–526.
- Pezzilli R, Bini L, Fantini L, Baroni E, Campana D, et al. (2006) Quality of life in chronic pancreatitis. *World journal of gastroenterology*: WJG 12: 6249–6251.
- Buscher HC, Wilder-Smith OH, van Goor H (2006) Chronic pancreatitis patients show hyperalgesia of central origin: a pilot study. *European journal of pain* 10: 363–370.
- Etamad B, Whitcomb DC (2001) Chronic pancreatitis: diagnosis, classification, and new genetic developments. *Gastroenterology* 120: 682–707.
- Gardner TB, Kennedy AT, Gelrud A, Banks PA, Vege SS, et al. (2010) Chronic pancreatitis and its effect on employment and health care experience: results of a prospective American multicenter study. *Pancreas* 39: 498–501.
- Demir IE, Tieftrunk E, Maak M, Friess H, Ceyhan GO (2011) Pain mechanisms in chronic pancreatitis: of a master and his fire. *Langenbeck's archives of surgery/Deutsche Gesellschaft für Chirurgie* 396: 151–160.
- Woolf CJ, Salter MW (2000) Neuronal plasticity: increasing the gain in pain. *Science* 288: 1765–1769.
- Buscher HC, Schipper EE, Wilder-Smith OH, Jansen JB, van Goor H (2008) Limited effect of thoracoscopic splanchnicectomy in the treatment of severe chronic pancreatitis pain: a prospective long-term analysis of 75 cases. *Surgery* 143: 715–722.
- van Loo ES, van Baal MC, Gooszen HG, Ploeg RJ, Nieuwenhuijs VB (2010) Long-term quality of life after surgery for chronic pancreatitis. *The British journal of surgery* 97: 1079–1086.
- Riley JL, Robinson ME, Wade JB, Myers CD, Price DD (2001) Sex differences in negative emotional responses to chronic pain. *The journal of pain: official journal of the American Pain Society* 2: 354–359.
- Dworkin RH (2002) An overview of neuropathic pain: syndromes, symptoms, signs, and several mechanisms. *The Clinical journal of pain* 18: 343–349.
- Kewman DG, Vaishampayan N, Zald D, Han B (1991) Cognitive impairment in musculoskeletal pain patients. *International journal of psychiatry in medicine* 21: 253–262.
- Attree EA, Dancy CP, Keeling D, Wilson C (2003) Cognitive function in people with chronic illness: inflammatory bowel disease and irritable bowel syndrome. *Applied neuropsychology* 10: 96–104.
- Dick B, Eccleston C, Crombez G (2002) Attentional functioning in fibromyalgia, rheumatoid arthritis, and musculoskeletal pain patients. *Arthritis and rheumatism* 47: 639–644.
- Eccleston C (1995) Chronic pain and distraction: an experimental investigation into the role of sustained and shifting attention in the processing of chronic persistent pain. *Behaviour research and therapy* 33: 391–405.
- Eccleston C (1995) The attentional control of pain: methodological and theoretical concerns. *Pain* 63: 3–10.
- Grossi ML, Goldberg MB, Locker D, Tenenbaum HC (2001) Reduced neuropsychologic measures as predictors of treatment outcome in patients with temporomandibular disorders. *Journal of orofacial pain* 15: 329–339.
- Harman K, Ruyak P (2005) Working through the pain: a controlled study of the impact of persistent pain on performing a computer task. *The Clinical journal of pain* 21: 216–222.
- Hart RP, Martelli MF, Zaslav ND (2000) Chronic pain and neuropsychological functioning. *Neuropsychology review* 10: 131–149.
- Park DC, Glass JM, Minear M, Crofford LJ (2001) Cognitive function in fibromyalgia patients. *Arthritis and rheumatism* 44: 2125–2133.
- Seminowicz DA, Davis KD (2007) A re-examination of pain-cognition interactions: implications for neuroimaging. *Pain* 130: 8–13.
- Suhr JA (2003) Neuropsychological impairment in fibromyalgia: relation to depression, fatigue, and pain. *Journal of psychosomatic research* 55: 321–329.
- Apkarian AV, Scholz J (2006) Shared mechanisms between chronic pain and neurodegenerative disease. *Drug Discovery Today* 3: 319–326.
- Apkarian AV, Baliki MN, Geha PY (2009) Towards a theory of chronic pain. *Progress in neurobiology* 87: 81–97.
- Apkarian AV, Hashmi JA, Baliki MN (2011) Pain and the brain: specificity and plasticity of the brain in clinical chronic pain. *Pain* 152: S49–64.
- Apkarian AV, Sosa Y, Sonty S, Levy RM, Harden RN, et al. (2004) Chronic back pain is associated with decreased prefrontal and thalamic gray matter density. *The Journal of neuroscience: the official journal of the Society for Neuroscience* 24: 10410–10415.
- Schmidt-Wilcke T, Leinisch E, Straube A, Kampf N, Draganski B, et al. (2005) Gray matter decrease in patients with chronic tension type headache. *Neurology* 65: 1483–1486.
- Schmidt-Wilcke T, Leinisch E, Ganssbauer S, Draganski B, Bogdahn U, et al. (2006) Affective components and intensity of pain correlate with structural differences in gray matter in chronic back pain patients. *Pain* 125: 89–97.
- Seminowicz DA, Labus JS, Bueller JA, Tillich K, Naliboff BD, et al. (2010) Regional gray matter density changes in brains of patients with irritable bowel syndrome. *Gastroenterology* 139: 48–57 e42.
- Apkarian AV, Sosa Y, Krauss BR, Thomas PS, Fredrickson BE, et al. (2004) Chronic pain patients are impaired on an emotional decision-making task. *Pain* 108: 129–136.
- Halpain S, Spencer K, Graber S (2005) Dynamics and pathology of dendritic spines. *Progress in brain research* 147: 29–37.
- Gomez RG, Fleming SH, Keller J, Flores B, Kenna H, et al. (2006) The neuropsychological profile of psychotic major depression and its relation to cortisol. *Biological psychiatry* 60: 472–478.
- Gallassi R, Morreale A, Pagni P (2001) The relationship between depression and cognition. *Archives of gerontology and geriatrics Supplement* 7: 163–171.
- Oosterman JM, Derksen LC, van Wijck AJ, Veldhuijzen DS, Kessels RP (2011) Memory functions in chronic pain: examining contributions of attention and age to test performance. *The Clinical journal of pain* 27: 70–75.
- Goel N, Rao H, Durmer JS, Dinges DF (2009) Neurocognitive consequences of sleep deprivation. *Seminars in neurology* 29: 320–339.
- Sjogren P, Thomsen AB, Olsen AK (2000) Impaired neuropsychological performance in chronic nonmalignant pain patients receiving long-term oral opioid therapy. *Journal of pain and symptom management* 19: 100–108.
- Sullivan EV, Fama R, Rosenbloom MJ, Pfefferbaum A (2002) A profile of neuropsychological deficits in alcoholic women. *Neuropsychology* 16: 74–83.

### Appendix S2 Appendix S2 shows the Akaike's Information Criteria.

(DOCX)

### Appendix S3 Appendix S3 shows how effects were calculated.

(DOCX)

### Appendix S4 Appendix S4 shows a sample calculation of effects and effect sizes of the predictors.

(DOCX)

## Acknowledgments

We heartily thank all the patients and volunteers for their participation in this study.

## Author Contributions

Conceived and designed the experiments: MLAJ SAEP MA EG KV OWS HvG. Performed the experiments: MLAJ SP. Analyzed the data: MLAJ SAEP PS CMvR. Contributed reagents/materials/analysis tools: MA EG KV HvG. Wrote the paper: MLAJ SAEP PS KV OWS CMvR HvG.



41. Clark CR, Paul RH, Williams LM, Arns M, Fallahpour K, et al. (2006) Standardized assessment of cognitive functioning during development and aging using an automated touchscreen battery. *Archives of clinical neuropsychology: the official journal of the National Academy of Neuropsychologists* 21: 449–467.
42. Henry JD, Crawford JR (2005) The short-form version of the Depression Anxiety Stress Scales (DASS-21): construct validity and normative data in a large non-clinical sample. *The British journal of clinical psychology/the British Psychological Society* 44: 227–239.
43. Snijders TAB, Bosker RJ (1999) *Multi-level analysis: An introduction to basic and advanced multi-level modeling*. London: Sage Publications. 91 p.
44. Pfeiffermann D, Skinner CJ, Holmes DJ, Goldstein H, Rasbash JR (1998) Weighting for unequal selection probabilities in multilevel models. *Journal of the Royal Statistical Society* 60: 23–40.
45. Browne W, Rasbash J (2004) *Multilevel modelling*; Bryman A, Hardy M, eds. London: Sage Publishers.
46. Leeuw Jd, Meijer E *Handbook of Multilevel Analysis*: Springer. 494 p.
47. Majer M, Welberg LA, Capuron L, Miller AH, Pagnoni G, et al. (2008) Neuropsychological performance in persons with chronic fatigue syndrome: results from a population-based study. *Psychosomatic medicine* 70: 829–836.
48. Sjogren P, Olsen AK, Thomsen AB, Dalberg J (2000) Neuropsychological performance in cancer patients: the role of oral opioids, pain and performance status. *Pain* 86: 237–245.
49. Oscar-Berman M, Marinkovic K (2007) Alcohol: effects on neurobehavioral functions and the brain. *Neuropsychology review* 17: 239–257.
50. Gilbert SJ, Burgess PW (2008) Executive function. *Current biology: CB* 18: R110–114.
51. Gallassi R, Di Sarro R, Morreale A, Amore M (2006) Memory impairment in patients with late-onset major depression: the effect of antidepressant therapy. *Journal of affective disorders* 91: 243–250.
52. Grisart JM, Van der Linden M (2001) Conscious and automatic uses of memory in chronic pain patients. *Pain* 94: 305–313.
53. Bartsch AJ, Homola G, Biller A, Smith SM, Weijers HG, et al. (2007) Manifestations of early brain recovery associated with abstinence from alcoholism. *Brain: a journal of neurology* 130: 36–47.
54. Ende G, Welzel H, Walter S, Weber-Fahr W, Diehl A, et al. (2005) Monitoring the effects of chronic alcohol consumption and abstinence on brain metabolism: a longitudinal proton magnetic resonance spectroscopy study. *Biological psychiatry* 58: 974–980.
55. Fein G, Torres J, Price LJ, Di Sclafani V (2006) Cognitive performance in long-term abstinent alcoholic individuals. *Alcoholism, clinical and experimental research* 30: 1538–1544.
56. Rosenbloom MJ, Pfefferbaum A, Sullivan EV (2004) Recovery of short-term memory and psychomotor speed but not postural stability with long-term sobriety in alcoholic women. *Neuropsychology* 18: 589–597.
57. Weiner DK, Rudy TE, Morrow L, Slaboda J, Lieber S (2006) The relationship between pain, neuropsychological performance, and physical function in community-dwelling older adults with chronic low back pain. *Pain medicine* 7: 60–70.
58. Glass JM (2009) Review of cognitive dysfunction in fibromyalgia: a convergence on working memory and attentional control impairments. *Rheumatic diseases clinics of North America* 35: 299–311.
59. Sjogren P, Christrup LL, Petersen MA, Hojsted J (2005) Neuropsychological assessment of chronic non-malignant pain patients treated in a multidisciplinary pain centre. *European journal of pain* 9: 453–462.
60. Wehler M, Nichterlein R, Fischer B, Farnbacher M, Reulbach U, et al. (2004) Factors associated with health-related quality of life in chronic pancreatitis. *The American journal of gastroenterology* 99: 138–146.
