# Supplementary material for: Neurodegenerative Properties of Chronic Pain: Cognitive Decline in Patients with Chronic Pancreatitis
Source: PLoS One. 2011 Aug 18;6(8):e23363. doi: 10.1371/journal.pone.0023363 (PMC3158076; doi:10.1371/journal.pone.0023363)
Supplement: Appendix S3 — shows how effects were calculated. (DOCX) [file pone.0023363.s003.docx]

Appendix S3

An effect size (ES) is defined as:

(3)

: Range of predictor

: Range of dependent variable

Because all continuous variables were standardized the and have the value 4 (mean +/- 2 standard deviation; standard deviation = 1). For the dichotomies variables the range is 1 (possible values 0 and 1).

An effect size of continuous variable is defined as:

(4)

Thus, an effect size of dichotomous variable is defined as:

(5)
